# Supplementary material for: Effect of Early vs Delayed Surgical Treatment on Motor Recovery in Incomplete Cervical Spinal Cord Injury With Preexisting Cervical Stenosis: A Randomized Clinical Trial
Source: PubMed Central journal article supplement (PMC8579238; doi:10.1001/jamanetworkopen.2021.33604), 2021-11-09
Supplement: jamanetwopen-e2133604-s002.pdf [file jamanetwopen-e2133604-s002.pdf]

## Supplemental Online Content

The OSCIS investigators. Effect of early vs delayed surgical treatment on motor recovery in incomplete cervical spinal cord injury with preexisting cervical stenosis: a randomized clinical trial. *JAMA Netw Open*. 2021;4(11):e2133604.  
doi:10.1001/jamanetworkopen.2021.33604

**eTable 1.** Eligibility Criteria for Participants

**eTable 2.** Intraoperative Adverse Events

**eTable 3.** Baseline Characteristics of the Study Participants With or Without Primary Outcomes at 1 year

**eTable 4.** Adverse Events and Complications During the Follow-up Period

**eFigure 1.** Study Flowchart

**eFigure 2.** Change in Motor Neurological Level of Injury During the Study Period, According to Treatment Group

**eFigure 3.** Mean SCIM Score During the Study Period, According to Treatment Group

**eFigure 4.** Mean EQ-5D Utility Score During the Study Period, According to Treatment Group

This supplemental material has been provided by the authors to give readers additional information about their work.

**eTable 1.** Eligibility Criteria for Participants

**Inclusion Criteria:**

- Aged 20 to 79 years
- ASIA Impairment Scale C<sup>a</sup>
- Cervical canal stenosis confirmed based on findings of magnetic resonance imaging and computed tomography due to pre-existing conditions, such as spondylosis and ossification of the posterior longitudinal ligament
- Without bone injury (spinal fracture or dislocation)

**Exclusion Criteria:**

- Unstable medical status
- Unable to undergo surgery within 24 hours after admission
- Impaired consciousness or mental disorder that precludes neurological examination
- Difficulty in obtaining informed consent

Abbreviation: ASIA, American Spinal Injury Association.

<sup>a</sup> Motor function is preserved below the neurological level, and more than half of key muscles below the neurological level have a muscle grade of < 3.

**eTable 2.** Intraoperative Adverse Events

|                                     | <b>Early surgery<br/>(n=37)</b> |  | <b>Delayed surgery<br/>(n=26)<sup>a</sup></b> |  | <b>P Value</b> |
|-------------------------------------|---------------------------------|--|-----------------------------------------------|--|----------------|
| Type of surgery                     |                                 |  |                                               |  |                |
| Laminoplasty                        | 34                              |  | 24                                            |  | 0.95           |
| Posterior decompression and fusion  | 3                               |  | 2                                             |  |                |
| Time (min), median, (IQR)           | 133 (108-169)                   |  | 150 (121-171)                                 |  | 0.36           |
| Blood loss (mL), median, (IQR)      | 136 (44-250)                    |  | 105 (60-214)                                  |  | 0.97           |
| Nighttime surgery                   | 10                              |  | 1                                             |  |                |
| Allogeneic blood transfusion        | 4                               |  | 0                                             |  |                |
| Stroke                              | 1                               |  | 0                                             |  |                |
| Worsening of paralysis              | 2                               |  | 0                                             |  |                |
| Incidental durotomy                 | 2                               |  | 1                                             |  |                |
| Continuing intubation after surgery | 10                              |  | 2                                             |  |                |

Abbreviation: IQR, interquartile range.

<sup>a</sup> Seven of 33 patients assigned to the delayed group did not undergo surgery within 1 year.

<sup>b</sup> P values were calculated using chi square test for "type of surgery" and Wilcoxon test for "time" and "blood loss."

<sup>c</sup> Nighttime surgery indicates operations that started between 8 pm and 6 am.

<sup>d</sup> Following prespecified adverse events did not occur in either treatment group: myocardial infarction, pulmonary embolism, vertebral artery injury, esophageal injury, pneumothorax, allergy, compressive peripheral nerve palsy, and wrong-level surgery.

**eTable 3.** Baseline Characteristics of the Study Participants With or Without Primary Outcomes at 1 year

|                                 | <b>Primary Outcome at 1 year (N=56)</b> | <b>No Primary Outcome at 1 year<sup>a</sup> (N=14)</b> | <b>P-value</b> |
|---------------------------------|-----------------------------------------|--------------------------------------------------------|----------------|
| Early surgery / Delayed surgery | 30/26                                   | 7/7                                                    | 0.81           |
| Age—years                       | 63.6±9.4                                | 71.4±6.4                                               | 0.004          |
| Male sex—no.(%)                 | 51 (91)                                 | 14 (100)                                               | 0.25           |
| OPLL—no.(%)                     | 12 (32)                                 | 12 (36)                                                | 0.62           |
| ASIA motor score at admission   | 33.0±12.4                               | 33.7±12.6                                              | 0.86           |
| Central cord syndrome—no.       | 16                                      | 6                                                      | 0.57           |

Abbreviations: OPLL, ossification of the posterior longitudinal ligament; ASIA, American Spinal Injury Association.

<sup>a</sup> Including 6 patients who died during the study period.

<sup>b</sup> Values are expressed as mean ±SD.

<sup>c</sup> P values were calculated using chi square test except for “age” and “ASIA motor score” for which Student’s t–test was used.

**eTable 4.** Adverse Events and Complications During the Follow-up Period

|                                             | <b>Early surgery<br/>(N=37)</b> | <b>Delayed surgery<br/>(N=33)</b> |  |
|---------------------------------------------|---------------------------------|-----------------------------------|--|
| Death                                       | 3                               | 3                                 |  |
| Worsening of paralysis<br>(within 3 months) | 3                               | 4                                 |  |
| Worsening of paralysis<br>(after 3 months)  | 3                               | 2                                 |  |
| Reoperation                                 | 1                               | 0                                 |  |
| Tracheostomy                                | 2                               | 2                                 |  |
| Sepsis                                      | 1                               | 1                                 |  |
| Pneumonia                                   | 4                               | 4                                 |  |
| Atelectasis                                 | 2                               | 2                                 |  |
| Other respiratory<br>complications          | 0                               | 1 pleuritis                       |  |
| Surgical site infection<br>(superficial)    | 1                               | 0                                 |  |
| Surgical site infection<br>(deep)           | 0                               | 1                                 |  |
| Urinary tract infection                     | 12                              | 7                                 |  |
| Other infection                             | 2                               | 1                                 |  |
| Gastrointestinal bleeding                   | 0                               | 1                                 |  |
| Gastric ulcer                               | 0                               | 1                                 |  |
| Other cardiac complications                 | 0                               | 1 arrhythmia                      |  |
| Pulmonary embolism                          | 1                               | 0                                 |  |
| Liver disfunction                           | 0                               | 2                                 |  |
| Delirium                                    | 3                               | 6                                 |  |
| Depression                                  | 1                               | 4                                 |  |
| Other minor complications                   | 12                              | 16                                |  |

<sup>a</sup> This table included all serious adverse events that occurred before the 1-year follow-up, but were not necessarily caused by the treatment. The number of patients who developed complications is shown.

<sup>b</sup> Following prespecified adverse events did not occur in either treatment group: acute respiratory distress syndrome, ileus, acute coronary syndrome, cerebrovascular complications, or renal dysfunction.

# Flow of OSCIS study

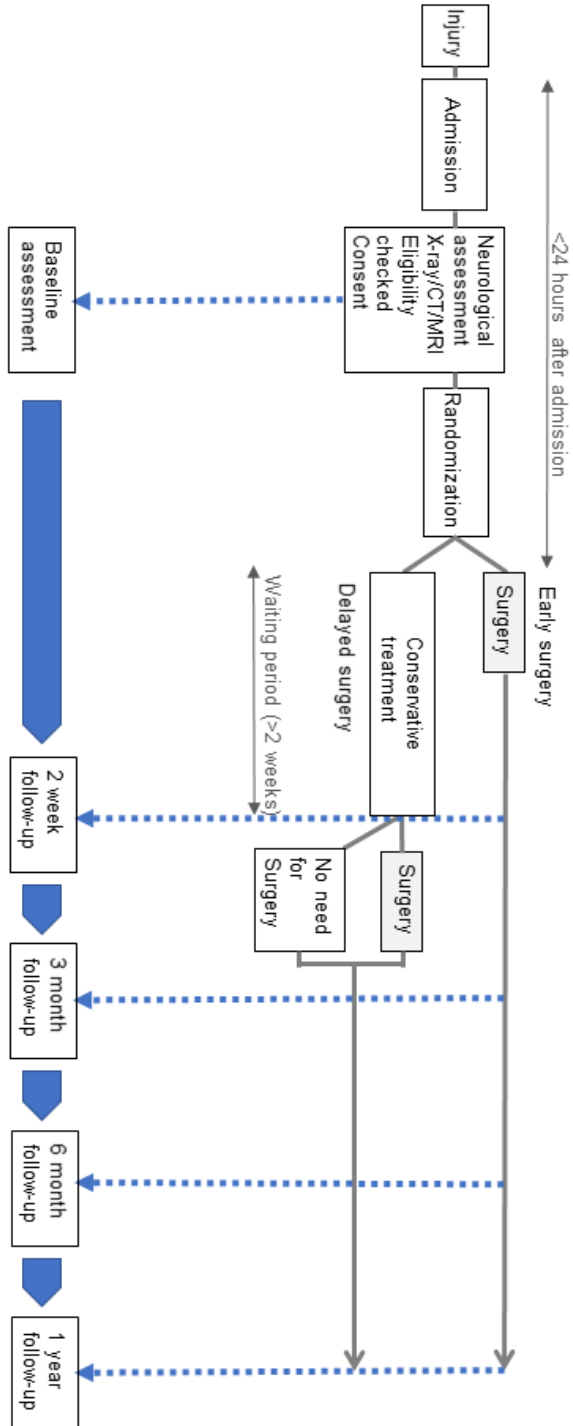

eFigure 1. Study flow

eFigure 1. Study Flowchart

**eFigure 2.** Change in Motor Neurological Level of Injury During the Study Period, According to Treatment Group

**eFigure 2.** Change in Motor Neurological Level of Injury during the Study Period, According to Treatment Group

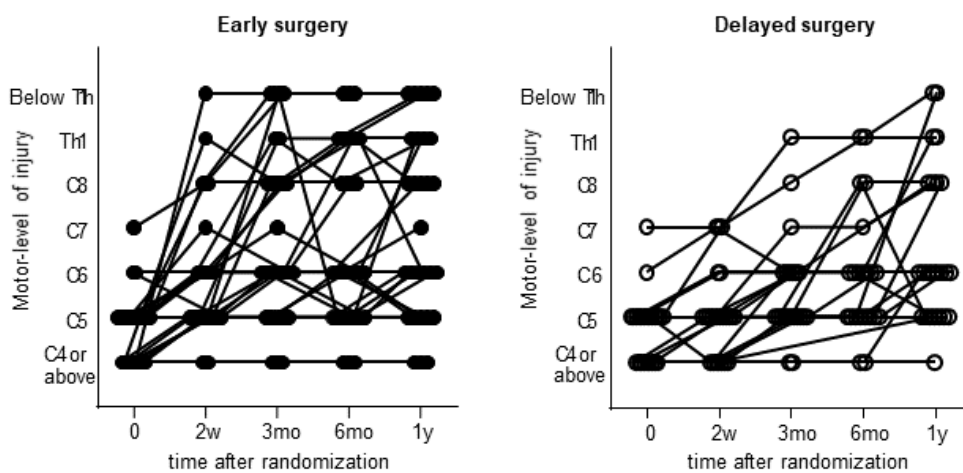

The graph shows the most caudal segment of the spinal cord with antigravity motor function on both sides of each case. When the functional level reaches lower limbs, the case is described as "Below Th1".

**eFigure 3. Mean SCIM Score During the Study Period, According to Treatment Group**

**eFigure 3. Mean SCIM Score during the Study Period, According to Treatment Group**

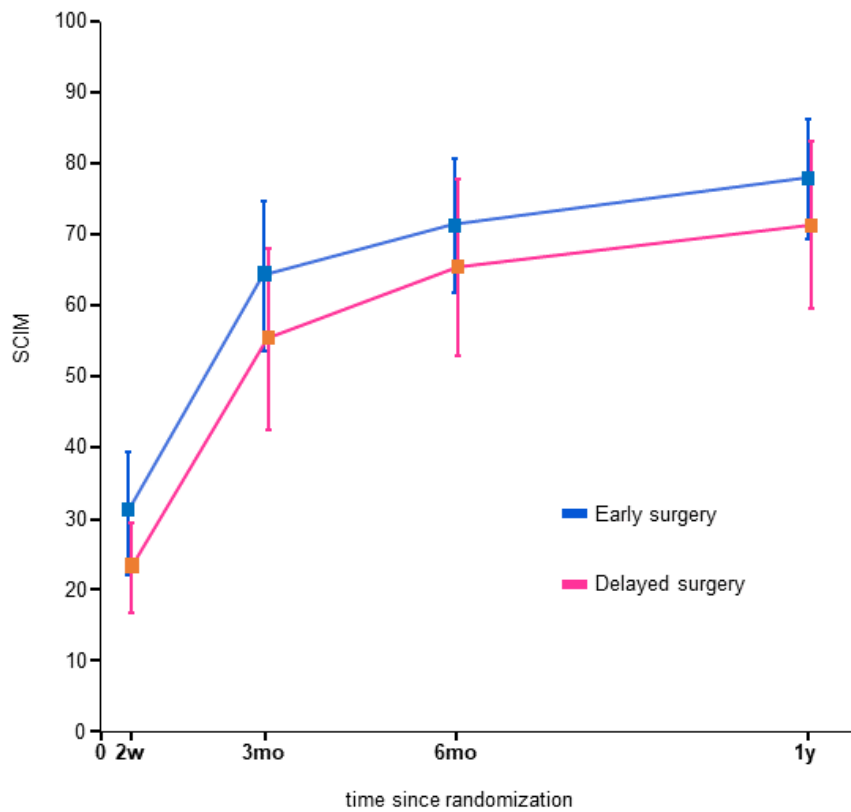

| No. of Patients | 0 w | 2w | 3mo | 6mo | 1y |
|-----------------|-----|----|-----|-----|----|
| Early surgery   | X   | 37 | 35  | 33  | 30 |
| Delayed surgery | X   | 33 | 27  | 24  | 23 |

The graph shows the mean total Spinal Cord Independence Measure (SCIM) score for groups randomly assigned to early surgery within 24 hours after admission or to receive delayed surgery following at least 2 weeks of conservative treatment. The I bars indicate 95% confidence intervals.



**eFigure 4.** Mean EQ-5D Utility Score During the Study Period, According to Treatment Group

**eFigure 4.** Mean EQ-5D Utility Score during the Study Period, According to Treatment Group

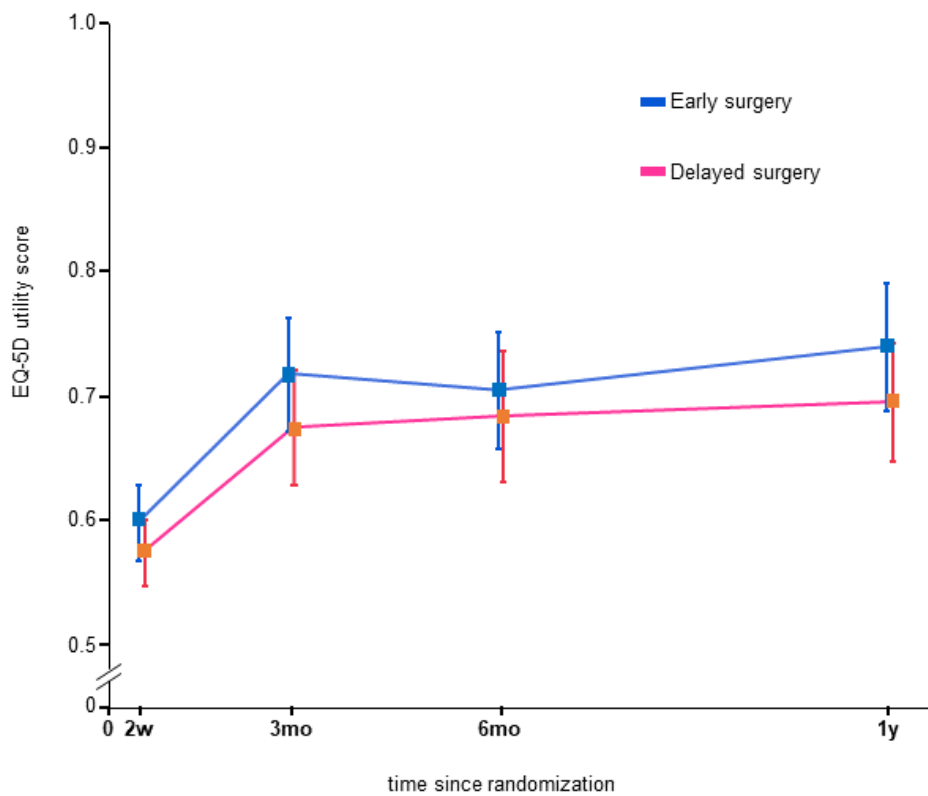

| No. of Patients | 0 w | 2 w | 3 mo | 6 mo | 1 y |
|-----------------|-----|-----|------|------|-----|
| Early surgery   | X   | 37  | 33   | 32   | 28  |
| Delayed surgery | X   | 32  | 25   | 20   | 22  |

The graph shows the mean European Quality of Life-5Dimension (EQ-5D) utility score for groups randomly assigned to early surgery within 24 hours after admission or to receive delayed surgery following at least 2 weeks of conservative treatment. The bars indicate 95% confidence intervals.
