# Supplementary material for: Effect of Early vs Delayed Surgical Treatment on Motor Recovery in Incomplete Cervical Spinal Cord Injury With Preexisting Cervical Stenosis: A Randomized Clinical Trial
Source: PubMed Central journal article supplement (PMC8579238; doi:10.1001/jamanetworkopen.2021.33604), 2021-11-09
Supplement: jamanetwopen-e2133604-s003.pdf [file jamanetwopen-e2133604-s003.pdf]

## Data Sharing Statement

Chikuda. Effect of Early vs Delayed Surgical Treatment on Motor Recovery in Incomplete Cervical Spinal Cord Injury With Preexisting Cervical Stenosis. *JAMA Netw Open*. Published November 09, 2021. doi:10.1001/jamanetworkopen.2021.33604

### Data

**Data available:** Yes

**Data types:** Deidentified participant data

**How to access data:** chikuda-[tky@umin.ac.jp](mailto:tky@umin.ac.jp)

**When available:** beginning date: 12-01-2023

### Supporting Documents

**Document types:** None

### Additional Information

**Who can access the data:** researchers whose proposed use of the data has been approved

**Types of analyses:** for a specified purpose

**Mechanisms of data availability:** after approval of a proposal
